# Supplementary material for: MIP-1α Expression Induced by Co-Stimulation of Human Monocytic Cells with Palmitate and TNF-α Involves the TLR4-IRF3 Pathway and Is Amplified by Oxidative Stress
Source: PubMed Central journal article supplement (PMC7465096; doi:10.3390/cells9081799), 2020-07-29
Supplement: cells-09-01799-s001.pdf [file cells-09-01799-s001.pdf]

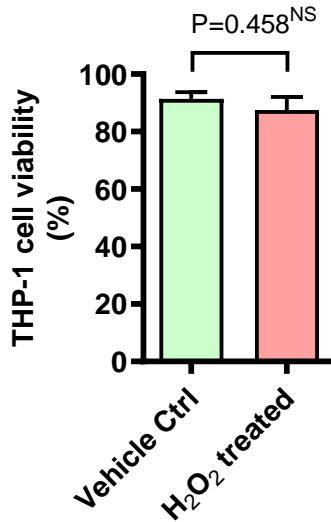

**Figure S1: Viability of THP-1 cells treated with H<sub>2</sub>O<sub>2</sub>.** THP-1 cells were plated ( $1 \times 10^6$  cells/mL/well) in triplicate wells of 12-well plates and incubated with H<sub>2</sub>O<sub>2</sub> (200 $\mu$ M) at 37°C for 10h for induction of oxidative stress., while the cells in control wells were incubated with vehicle (1% BSA) only. Cell viability (%) was determined by trypan blue dye exclusion test. The representative data (mean $\pm$ SEM) from three independent determinations with similar results show that cell viability differed non-significantly between H<sub>2</sub>O<sub>2</sub> treatment and control (P=0.458)

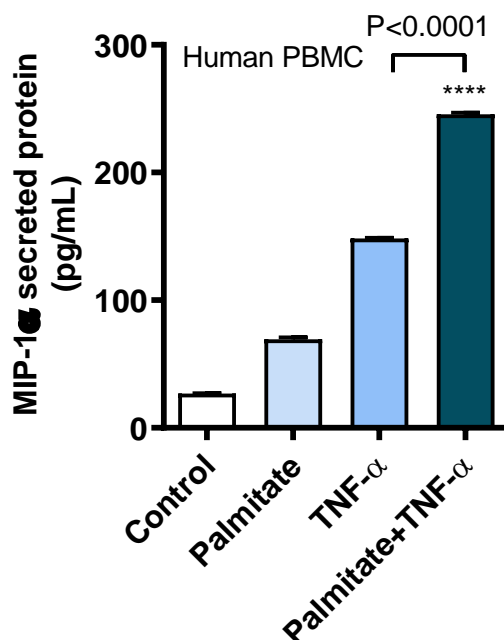

**Figure S2. Palmitate and TNF- $\alpha$  co-induce MIP-1 $\alpha$  expression in the human peripheral blood mononuclear cells (PBMC).** Human PBMC were isolated from the freshly collected peripheral blood samples from 3 healthy donors, cells were plated ( $1 \times 10^6$  cells/mL/well) in triplicate wells of 12-well plates and stimulated with palmitate (200  $\mu$ M) and/or TNF- $\alpha$  (10 ng/ml) or 0.1% BSA (Control) and incubated at 37°C for 24h as described in Materials and Methods. MIP-1 $\alpha$  secreted protein was measured in cell supernatants using commercial ELISA kit and following the manufacturer's instructions. The representative data (mean $\pm$ SEM) from three independent determinations with similar results show significantly elevated expression of MIP-1 $\alpha$  secreted protein in cells that were co-stimulated with palmitate and TNF- $\alpha$  ( $245.70 \pm 1.21$  pg/mL) as compared to stimulation with TNF- $\alpha$  alone ( $148.50 \pm 0.41$  pg/mL) ( $P < 0.0001$ ).

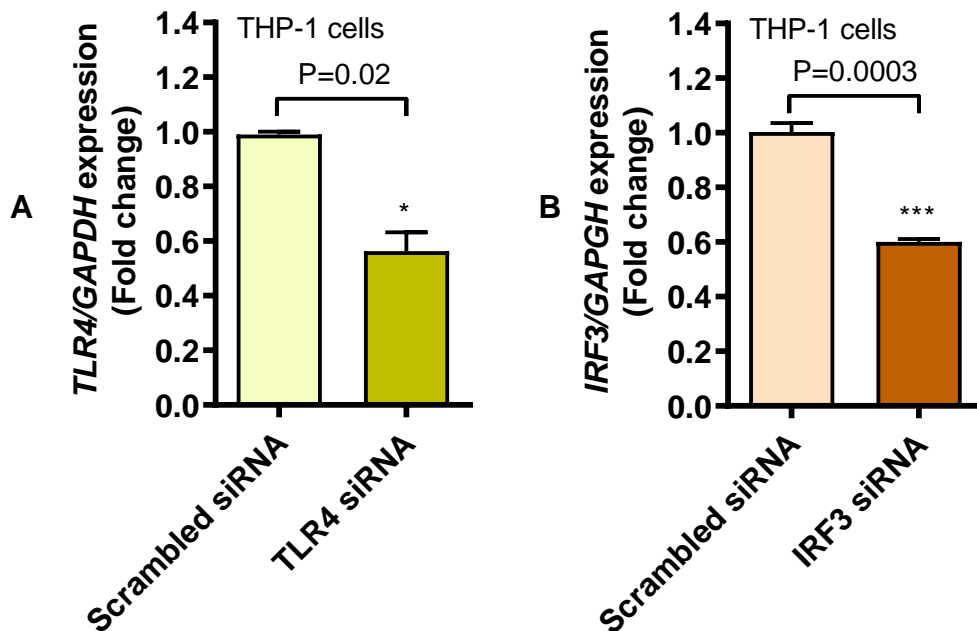

**Figure S3. Genetic ablation of TLR4 and IRF3 in THP-1 monocytic cells.** THP-1 monocytic cells were transfected separately with TLR4-/IRF3-specific siRNAs (30 nM each) or scrambled siRNA (30 nM) and pmaxGFP (0.5 $\mu$ g) using Amaxa Electroporation System as described in Materials and Methods. At 36h post-transfection, THP-1 cells (10<sup>6</sup> cells/mL/well) were treated in triplicate wells with palmitate (200  $\mu$ M) and/or TNF- $\alpha$  (10 ng/ml) or 0.1% BSA and incubated at 37°C for 24h. Cells were harvested for total RNA extraction and the efficiency of siRNA-mediated target gene suppression was assessed using real-time qRT-PCR. The representative data (mean $\pm$ SEM) from three independent determinations with similar results show significant suppression of (A) TLR4 (a reduction from 0.99 $\pm$ 0.01 folds to 0.56 $\pm$ 0.06 folds; P=0.02) and (B) IRF3 expression (a reduction from 0.99 $\pm$ 0.03 folds to 0.60 $\pm$ 0.01 folds; P=0.0003) in target gene specific siRNA transfected cells as compared to scrambled siRNA transfected controls.

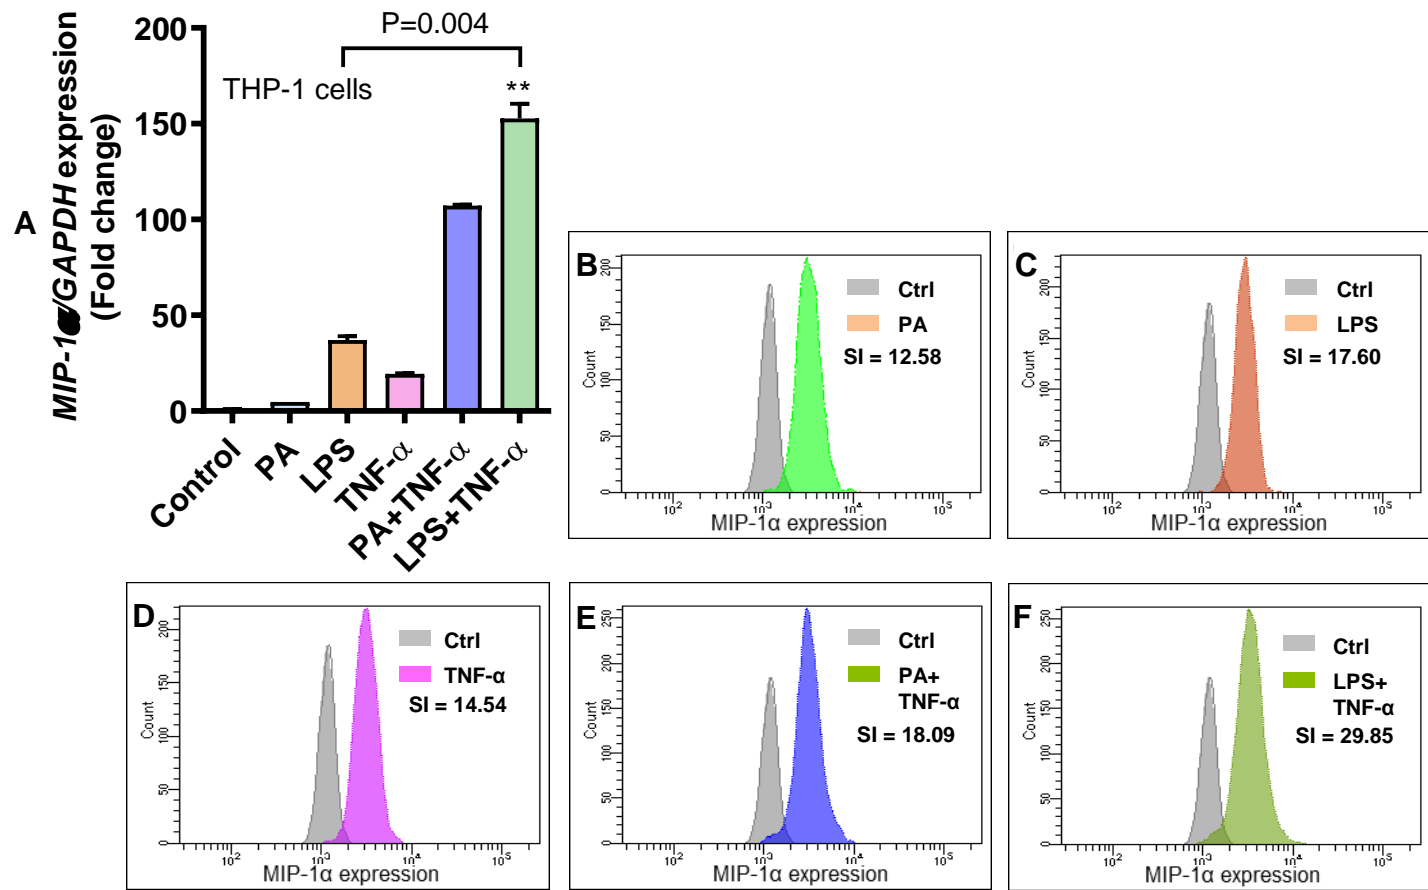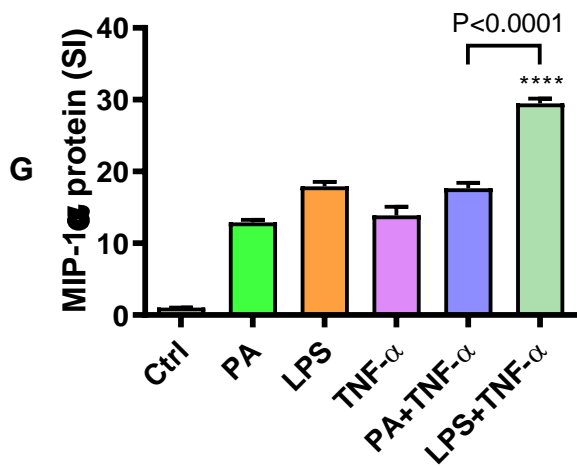

**Figure S4. MIP-1 $\alpha$  induction in THP-1 monocyctic cells by canonical and non-canonical TLR4 activators.** THP-1 cells were plated ( $1 \times 10^6$  cells/mL/well) in triplicate wells of 12-well plates and stimulated with 200 $\mu$ M palmitate (PA; a non-canonical agonist), 10 $\mu$ g/mL LPS (a canonical activator), 10 $\mu$ g/mL TNF- $\alpha$ , PA+TNF- $\alpha$ , and LPS+TNF- $\alpha$  while controls were treated with 0.1% BSA, and the cells were incubated at 37 $^{\circ}$ C for 24h. Total RNA was collected for assessing MIP-1 $\alpha$  gene expression and cells were stained for determining intracellular MIP-1 $\alpha$  protein expression as described in Materials and Methods. The representative data (mean $\pm$ SEM) from three independent determinations with similar results show (A) higher MIP-1 $\alpha$  gene expression induced by LPS+TNF- $\alpha$  than by PA+TNF- $\alpha$  ( $P=0.004$ ). (B-F) Representative histograms show MIP-1 $\alpha$  protein expression. (G) MIP-1 $\alpha$  protein expression induced by LPS+TNF- $\alpha$  was higher than that induced by PA+TNF- $\alpha$  ( $P<0.0001$ ).

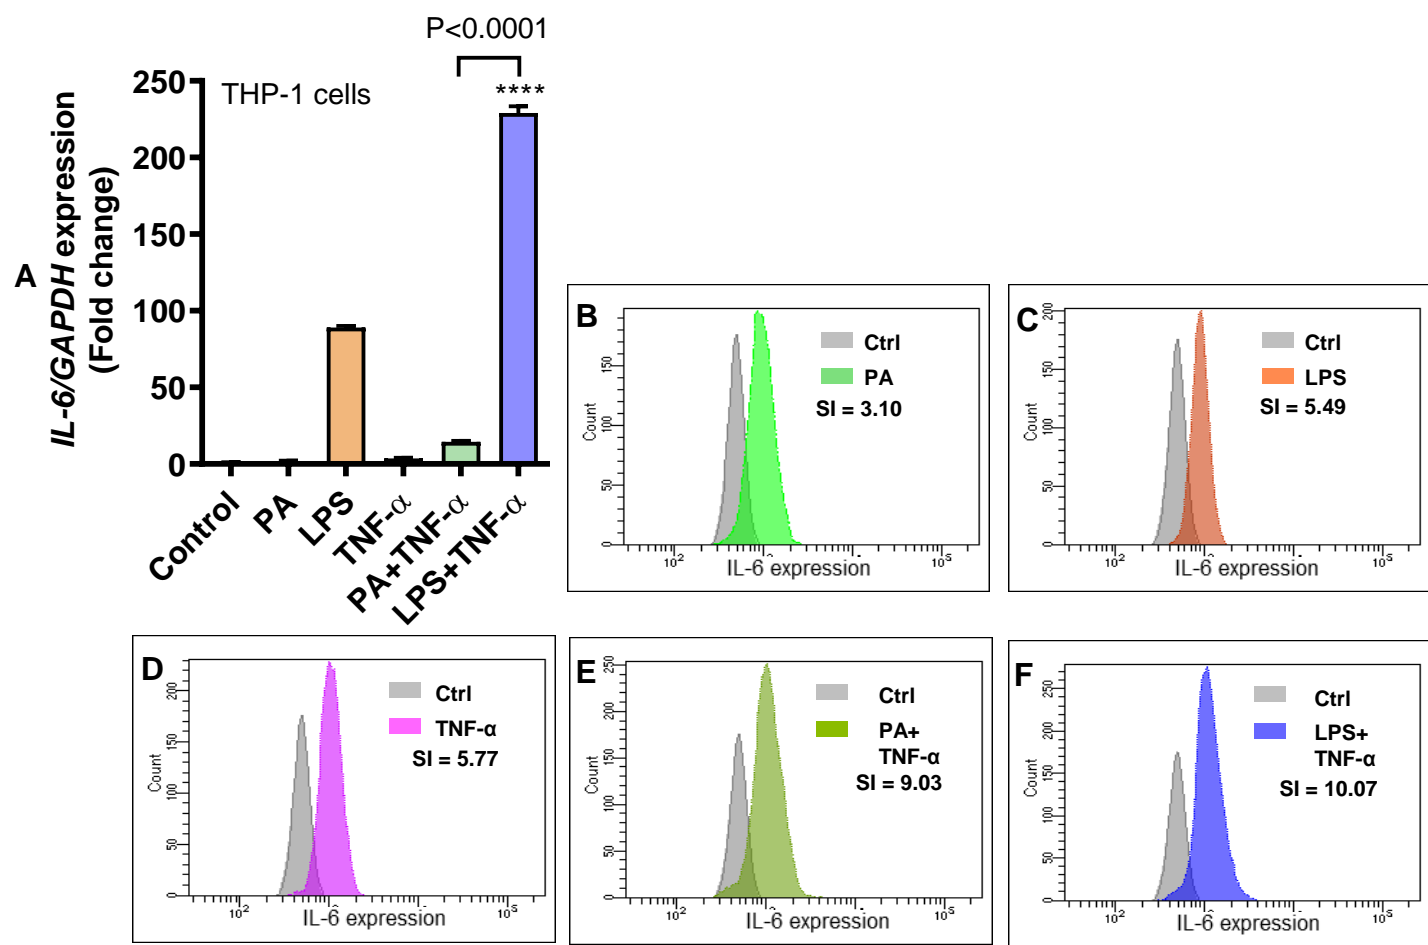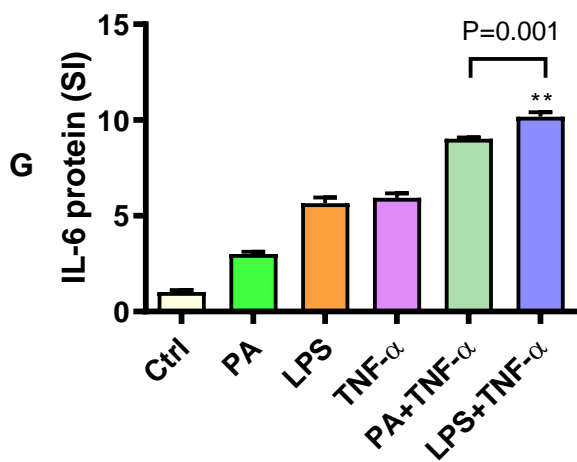

**Figure S5. Comparative IL-6 induction by LPS and palmitate, in combination with TNF- $\alpha$ , in THP-1 monocytic cells.** THP-1 cells were plated ( $1 \times 10^6$  cells/mL/well) in triplicate wells of 12-well plates and stimulated with 200 $\mu$ M palmitate (PA; a non-canonical agonist), 10 $\mu$ g/mL LPS (a canonical activator), 10 $\mu$ g/mL TNF- $\alpha$ , PA+TNF- $\alpha$ , and LPS+TNF- $\alpha$ , while controls were treated with 0.1% BSA, and the cells were incubated at 37°C for 24h. Total RNA was collected for assessing IL-6 gene expression and cells were stained to determine intracellular IL-6 protein expression. The representative data (mean $\pm$ SEM) from three independent determinations with similar results show (A) higher IL-6 gene expression induced by LPS+TNF- $\alpha$  than by PA+TNF- $\alpha$  (P=0.004). (B-F) Representative histograms show IL-6 protein expression. (G) IL-6 protein expression induced by LPS+TNF- $\alpha$  was higher than that induced by PA+TNF- $\alpha$  (P=0.001).
